# Supplementary material for: Functional Characterization of a Putative Glycine max ELF4 in Transgenic Arabidopsis and Its Role during Flowering Control
Source: PubMed Central journal article supplement (PMC5397463; doi:10.3389/fpls.2017.00618), 2017-04-20
Supplement: Image_4.pdf [file Image_4.pdf]

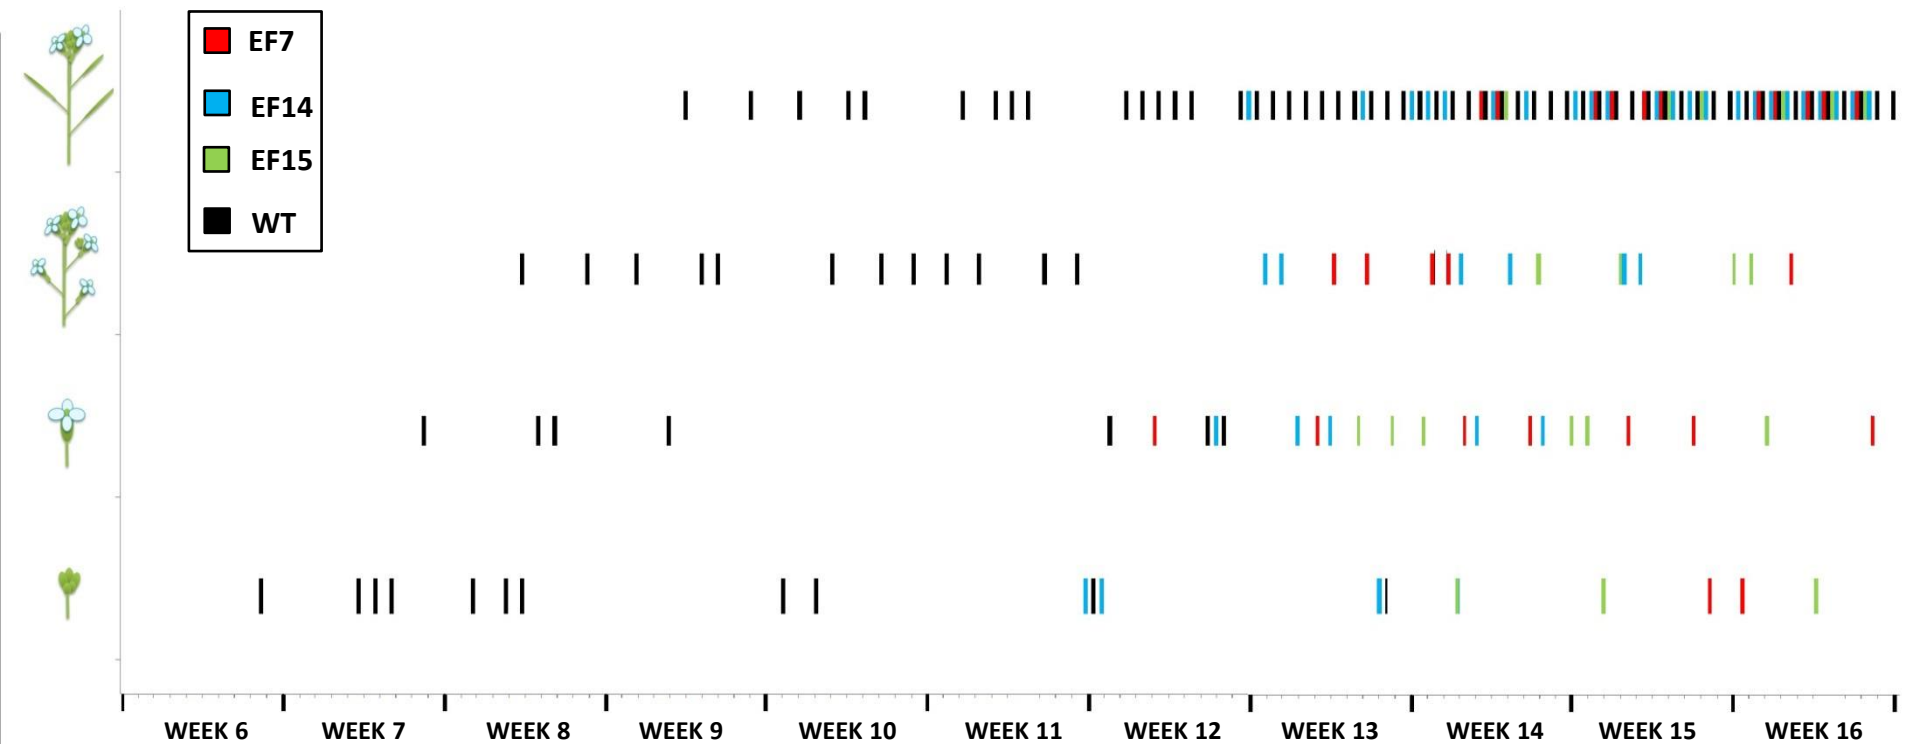

**Supplementary Image 4.** Flowering time and progression of silique formation under SD conditions. Flowering and progression of silique formation from transgenic lines EF7, EF14 and EF15 and from WT plants cultivated in under 10h of light are shown. Ten plants (represented by bars) from each genotype were monitored weekly during 16 weeks (abscissa) and were categorized in one of four flower or silique stages (vertical axis).
